# Supplementary material
Source: PubMed Central journal article supplement (PMC2841714)

## Supporting Information

### Cyclic Peptidyl Inhibitors against Human Peptidyl-Prolyl Isomerase Pin1

*Tao Liu,<sup>†</sup> Yu Liu,<sup>§</sup> Hung-Ying Kao,<sup>§</sup> and Dehua Pei<sup>\*,†,‡</sup>*

#### Table of Contents:

|                                                                                 |     |
|---------------------------------------------------------------------------------|-----|
| <b>Table S1.</b> Structures of amino acid building blocks for library synthesis | S2  |
| <b>Figure S1.</b> Library screening                                             | S3  |
| <b>Figure S2.</b> Hit Identification by PED-MS                                  | S3  |
| <b>Figure S3.</b> ITC of binding of Pin1 to peptides A, B, C, F, G and H        | S5  |
| <b>Figure S4.</b> HPLC tracings showing the purity of peptides E–K              | S6  |
| <b>Figure S5.</b> Structure of FITC-labeled peptide F                           | S9  |
| <b>Figure S6.</b> Fluorescence microscopy                                       | S10 |

**Table S1.** Structures of Building Blocks Used for the Cyclic Peptide Library

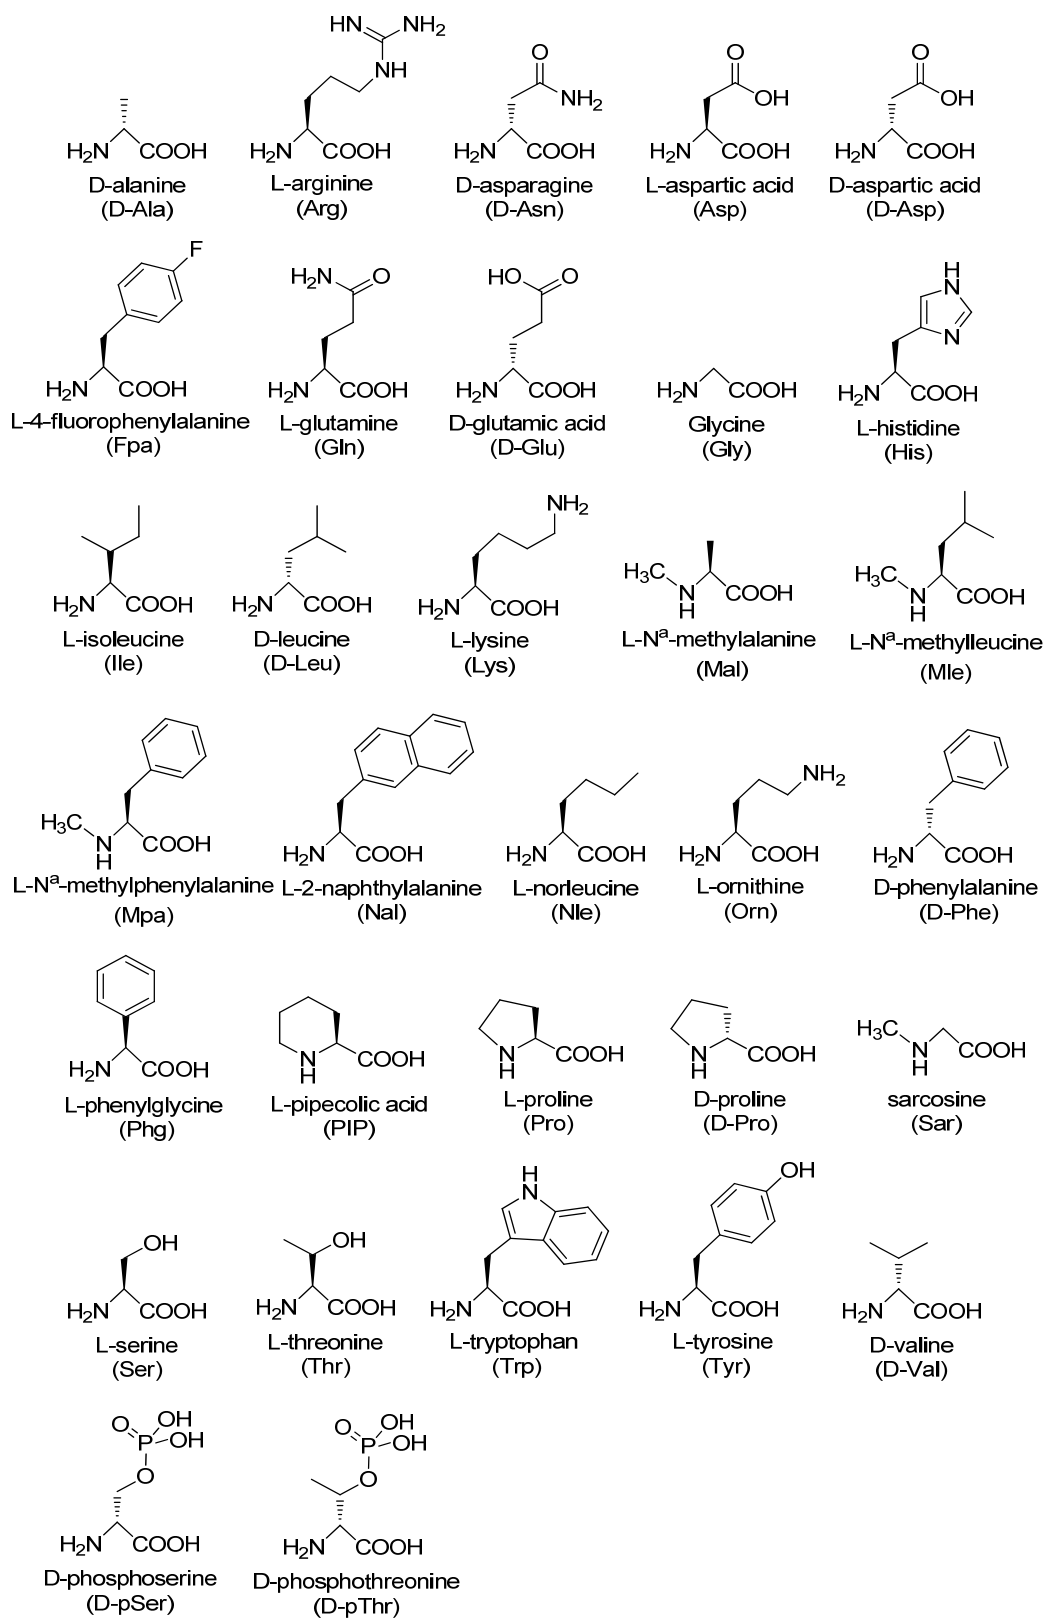

**Figure S1.** View of a positive bead derived from library screening against Texas Red-labeled Pin1-MBP under Olympus SZX12 fluorescence microscope.

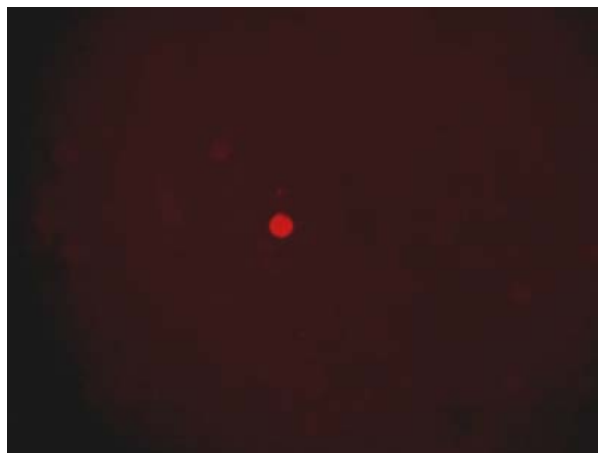

**Figure S2.** Hit Identification by PED-MS. (a) Partial Edman degradation of resin-bound peptide. PITC, phenylthioisocyanate; Fmoc-OSU, N-(9-Fluorenylmethoxycarbonyloxy) succinimide; M\*, homoserine lactone. (b) A representative MALDI-TOF spectrum of PED products derived from a single bead carrying peptide cyclo(D-Ala-Fpa-D-pThr-Pip-Tyr-Arg-D-Ala). *Procedure:* Selected resin beads were pooled and subjected to PED in a single reaction vessel. The beads were suspended in 160  $\mu$ L of pyridine/water (v/v 2:1) containing 0.1% triethylamine and mixed with an equal volume of pyridine containing 1.13 mg of Fmoc-OSu and 12  $\mu$ L of PITC. The reaction was allowed to proceed for 6 min with mixing, and the beads were washed with DCM, and TFA. The beads were treated twice with 400 $\mu$ L of TFA for 6 min each. After the resin was washed with DCM, pyridine, and pyridine/water (2:1), the cycle was repeated 5 times. After the final cycle, the N-terminal Fmoc group was removed by 20% piperidine in DMF. For MS analysis, the degraded beads were treated with 500  $\mu$ L of TFA containing NH<sub>4</sub>I (10 mg) and Me<sub>2</sub>S (20  $\mu$ L) on ice for 30 min to reduce any oxidized Met. After washing with water, the beads were transferred into microcentrifuge tubes (1 bead/tube) and each treated with 20  $\mu$ L of 70% TFA containing CNBr (40 mg/mL) overnight in the dark. The solvent was evaporated under vacuum, and the peptides were dissolved in 5  $\mu$ L of 0.1% TFA in water. One  $\mu$ L of the peptide solution was mixed with 2  $\mu$ L of saturated 4-hydroxy-alpha-cyanocinnamic acid in acetonitrile/0.1% TFA (1:1), and 1 $\mu$ L of the mixture was spotted onto a MALDI sample plate. Mass spectrometry was performed at Campus Chemical Instrument Center of The Ohio State University on a Bruker III MALDI-TOF instrument in an automated manner. The data obtained were analyzed by Moverz software (Proteometrics LLC, Winnipeg, Canada).

Figure S2

a

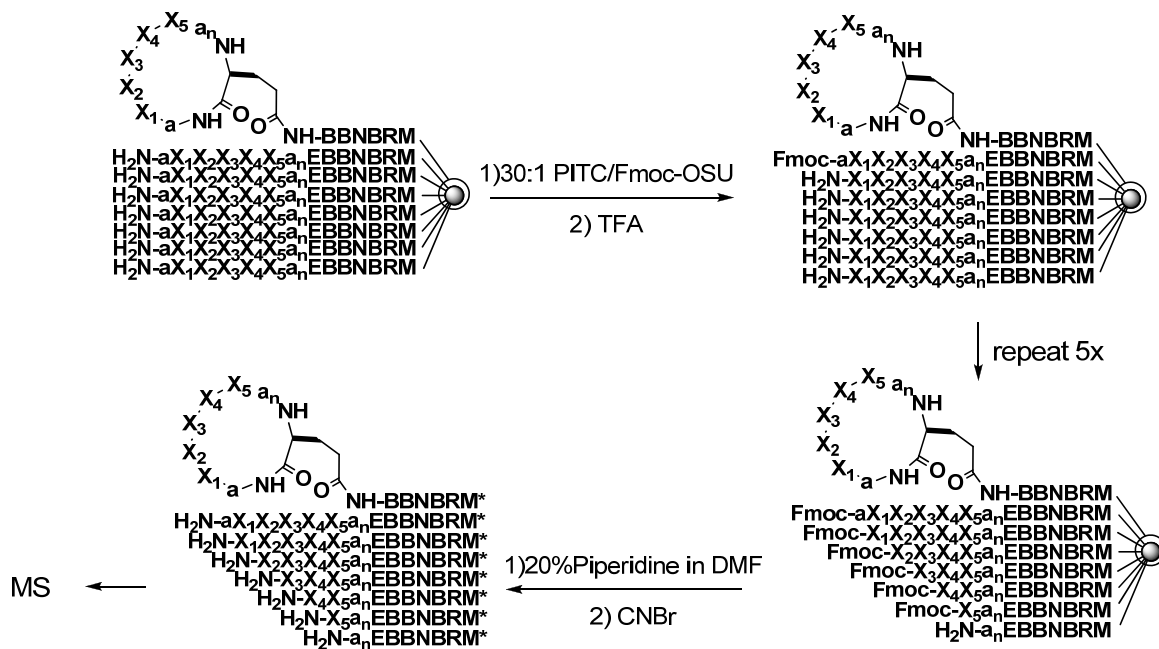

b

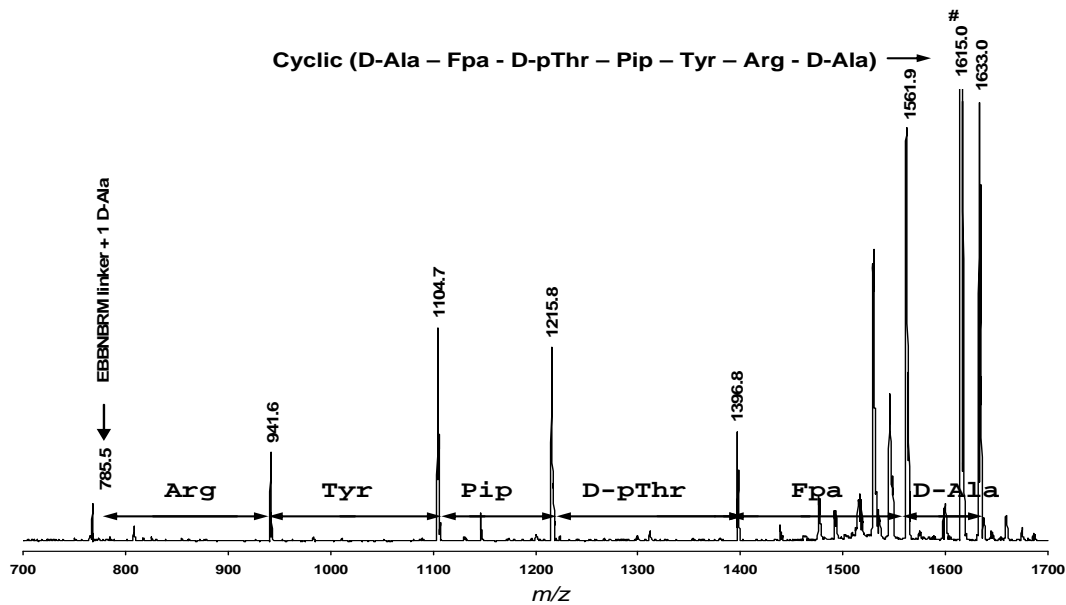

**Figure S3.** ITC of binding of Pin1 to peptides A, B, C, F, G and H.

Peptide A,  $K_D = 47 \pm 2$  nM

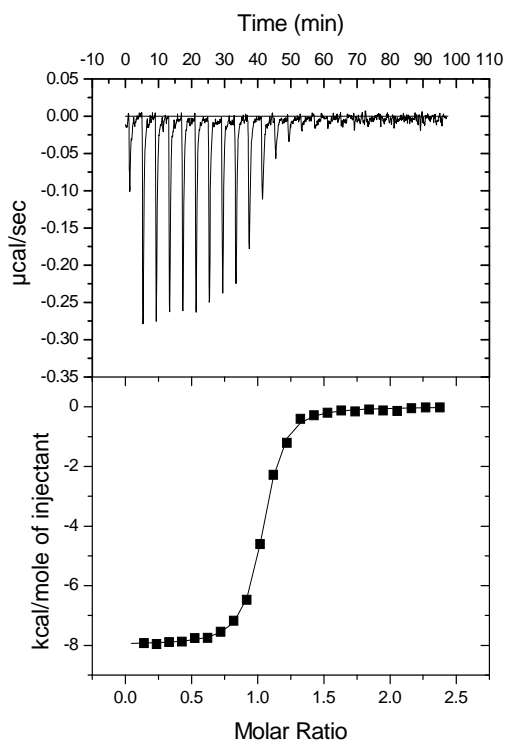

Peptide B,  $K_D = 48 \pm 4$  nM

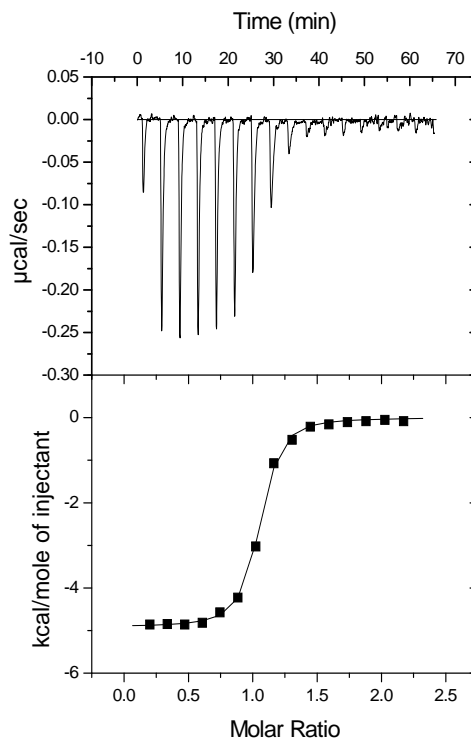

Peptide C,  $K_D = 920 \pm 60$  nM

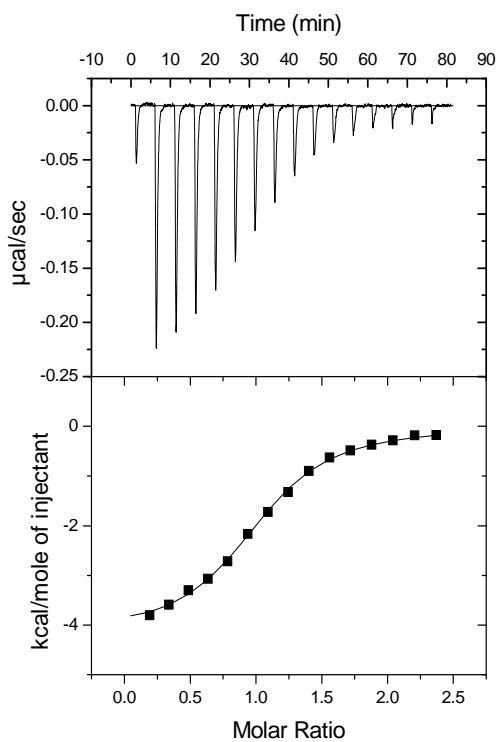

Peptide F,  $K_D = 33 \pm 2$  nM

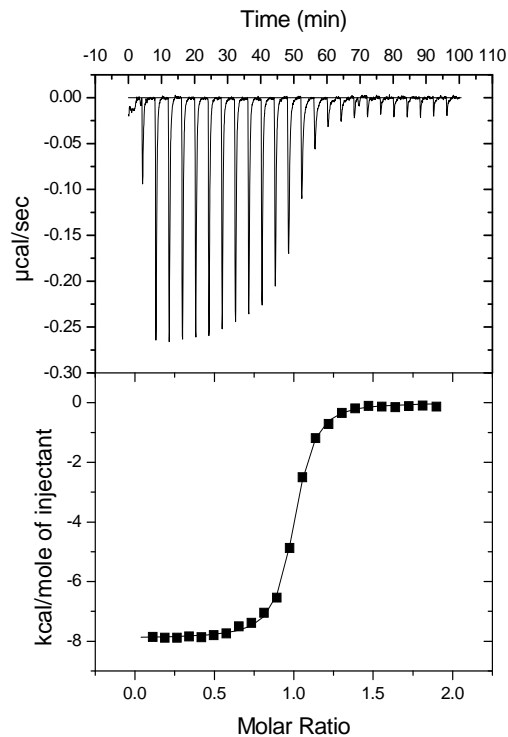

Peptide G,  $K_D = 170 \pm 10$  nM

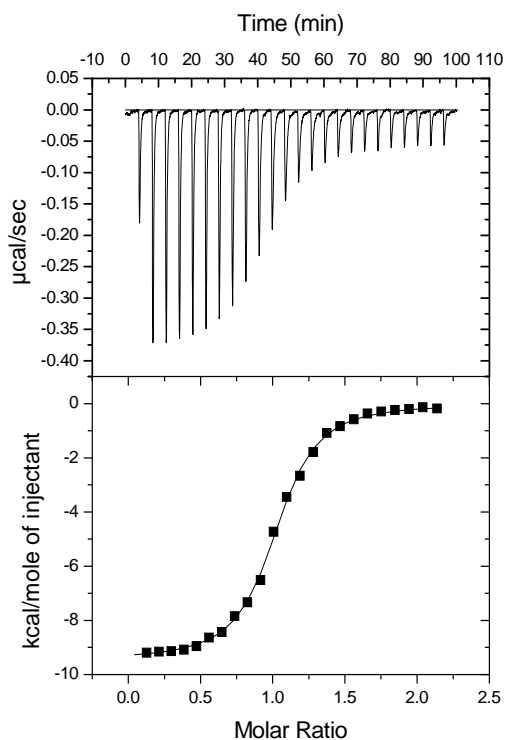

Peptide H,  $K_D = 980 \pm 30$  nM

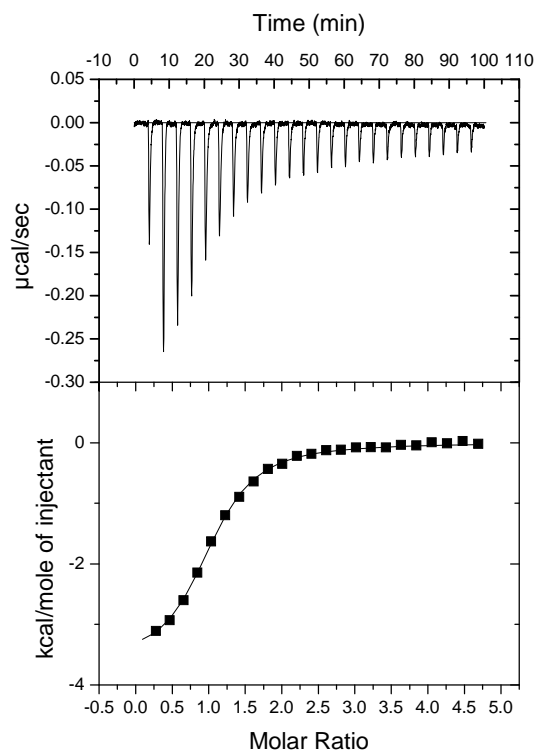

**Figure S4.** HPLC tracings showing the purity of peptides E–K. HPLC purified peptides were analyzed on a Varian (Palo Alto, CA) C-18 column, which was eluted with a linear gradient of 10–50% acetonitrile in 0.05% TFA in ddH<sub>2</sub>O over 30 min (flow rate of 1 mL/min), except for peptide E, which was eluted with a linear gradient of 10–40% acetonitrile in 0.05% TFA in ddH<sub>2</sub>O over 40 min.

Peptide E

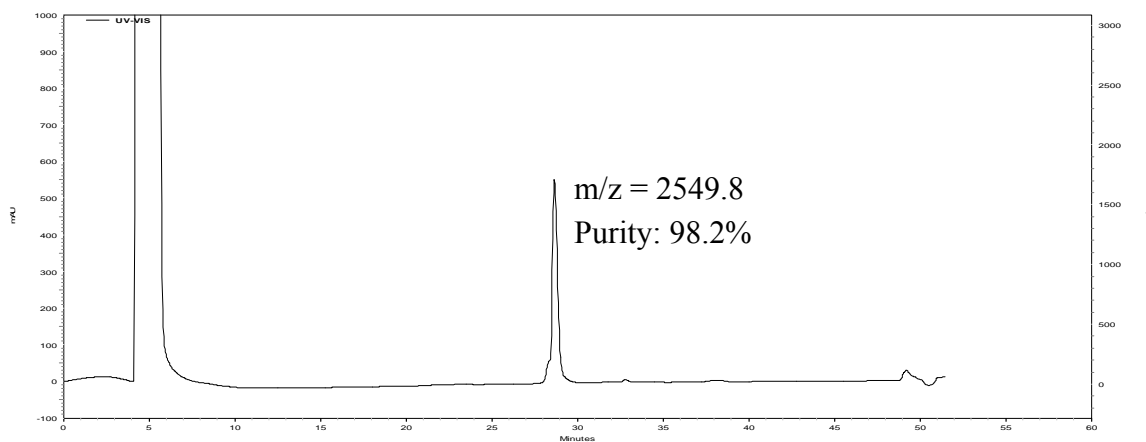

### Peptide F

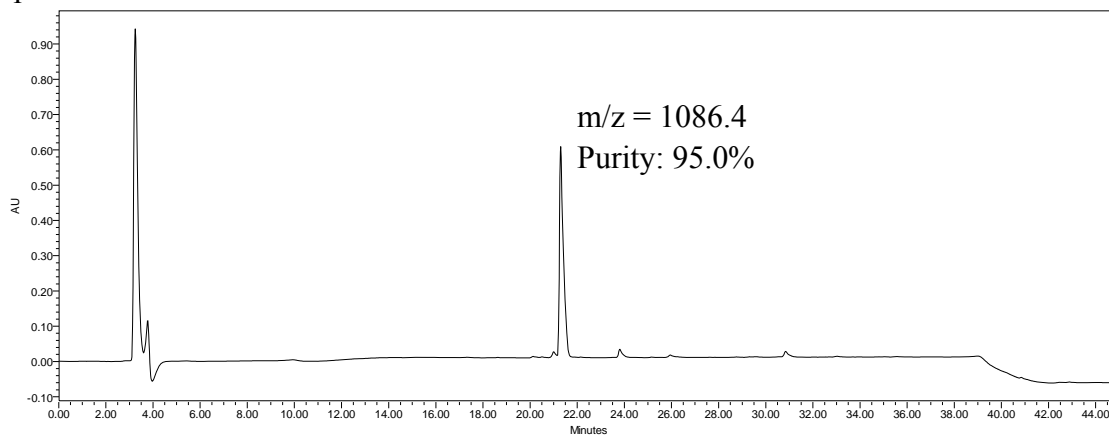

### Peptide G

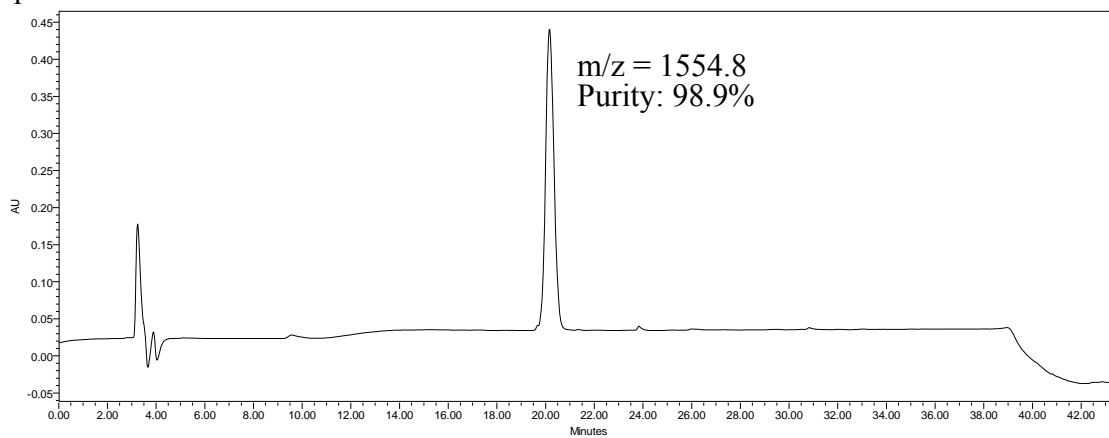

### Peptide H

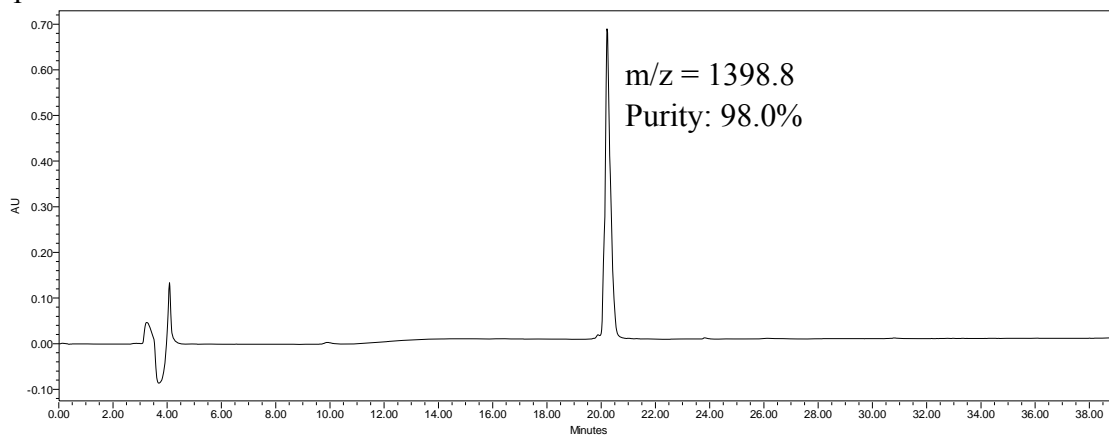

### Peptide I

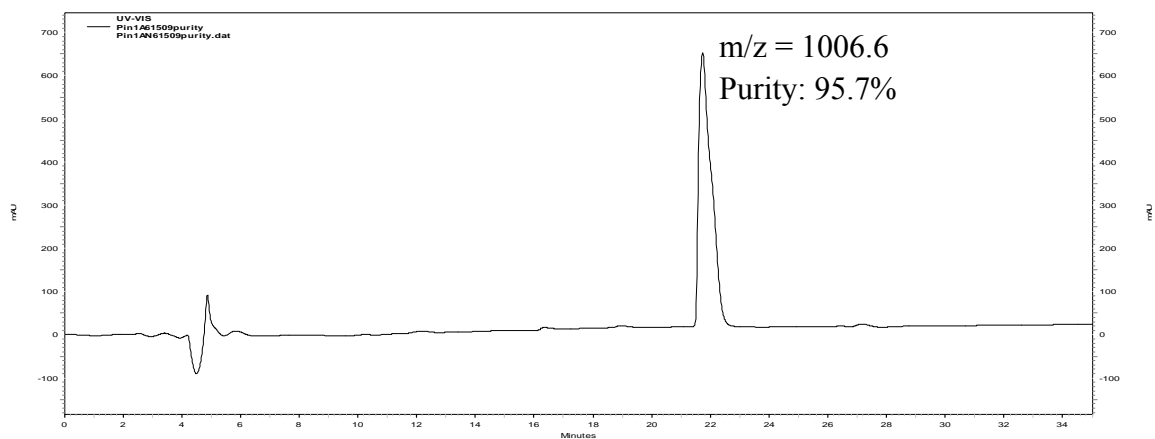

### Peptide J

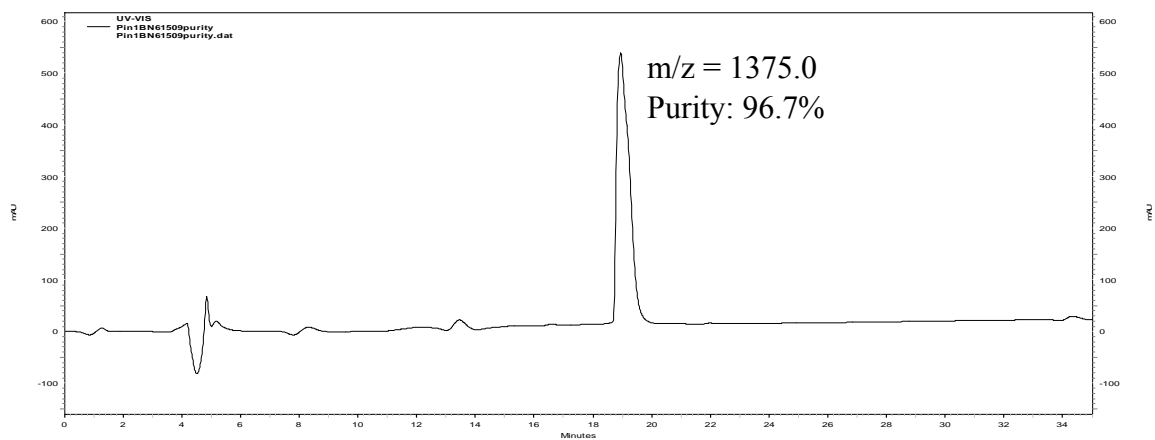

### Peptide K

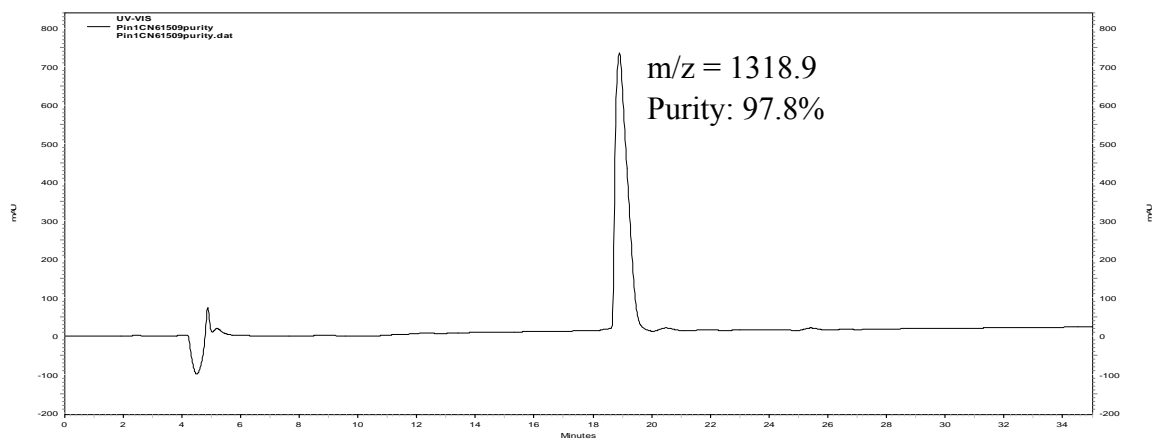



**Figure S5.** Structure of FITC-labeled peptide F.

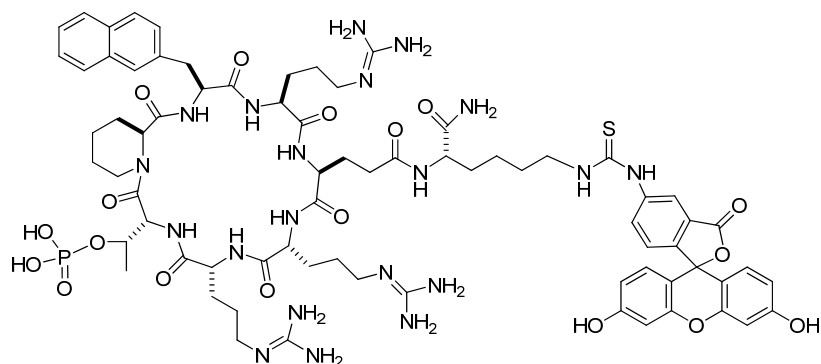

*Procedure:* FITC-labeled peptides F-K were generated by first synthesizing the cyclic peptides with a C-terminal lysine. Each peptide was purified by reversed-phase HPLC on a C18 column, reacted for 1 h with 5 molar equivalents of FITC (Pierce, catalog #46425) in 50 mM sodium bicarbonate (pH 8.5)/DMSO mixture (v/v ratio depended on the solubility of each peptide), and purified again by reversed-phase HPLC. The molecular mass of each peptide was confirmed by MALDI-TOF mass spectrometric analyses.

| <i>Peptide</i> | <i>Calcd Mass (<math>M + H^+</math>)</i> | <i>Observed <math>m/z</math></i> |
|----------------|------------------------------------------|----------------------------------|
| F              | 1603.66                                  | 1603.76                          |
| G              | 2071.96                                  | 2072.21                          |
| H              | 1915.86                                  | 1916.02                          |
| I              | 1523.69                                  | 1523.76                          |
| J              | 1991.99                                  | 1993.15                          |
| K              | 1835.89                                  | 1836.07                          |

**Figure S6.** Fluorescence microscopy showing the internalization and distribution of peptides I–K in HeLa cells.

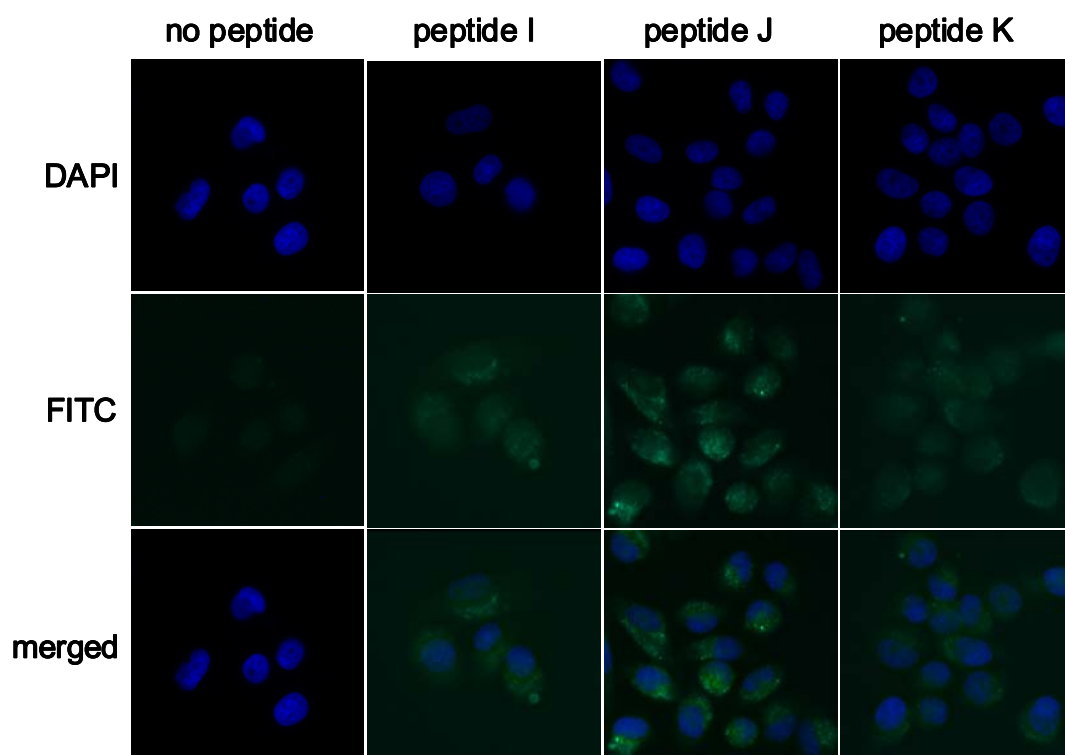

Supplement: NIHMS182609-supplement-1_si_001.pdf [file NIHMS182609-supplement-1_si_001.pdf]
